# Supplementary material
Source: publisher figshare collection journal article supplement (https://rs.figshare.com/ndownloader/files/13045862)
Supplement: Supplementary file [file 13045862]

(a) Parallel Navigation

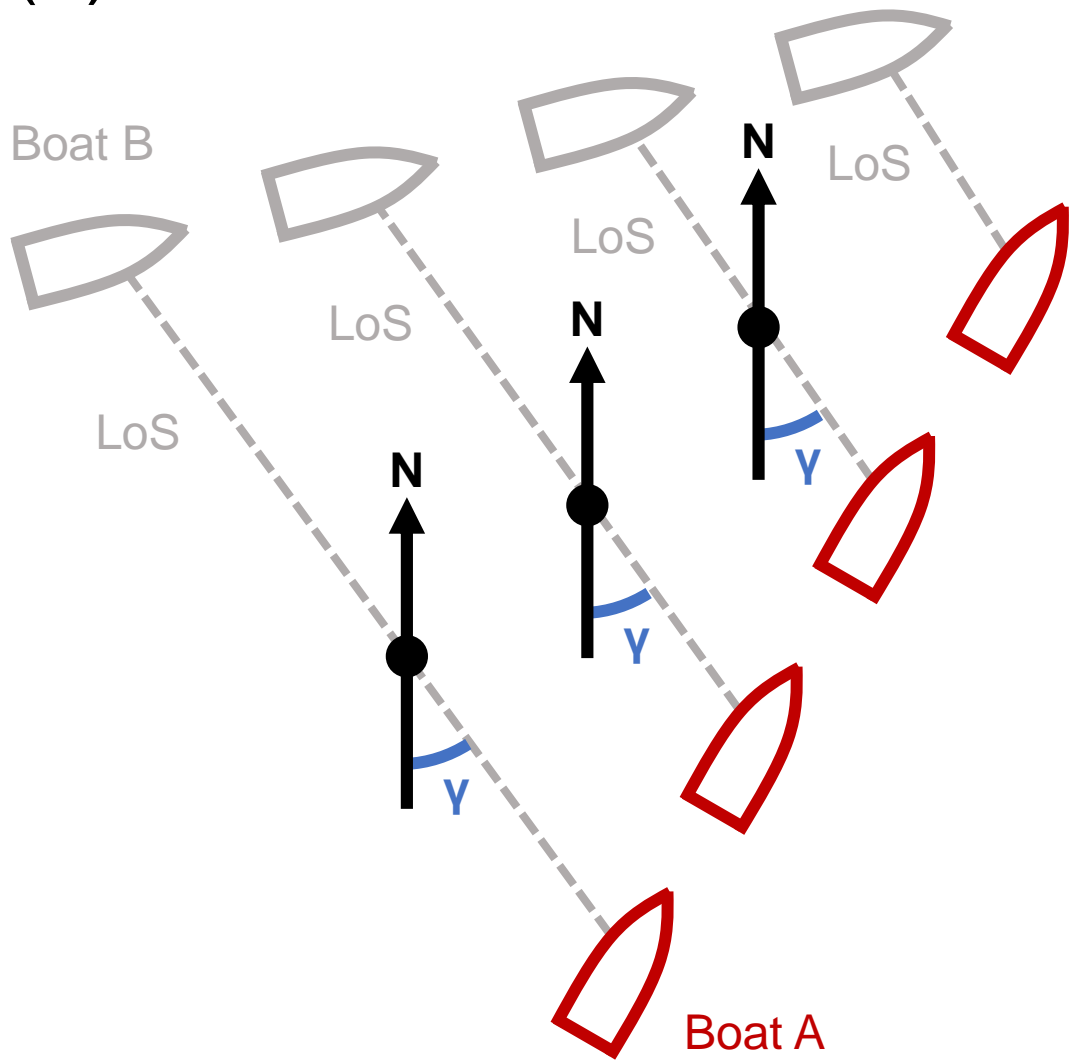

(b) Proportional Navigation

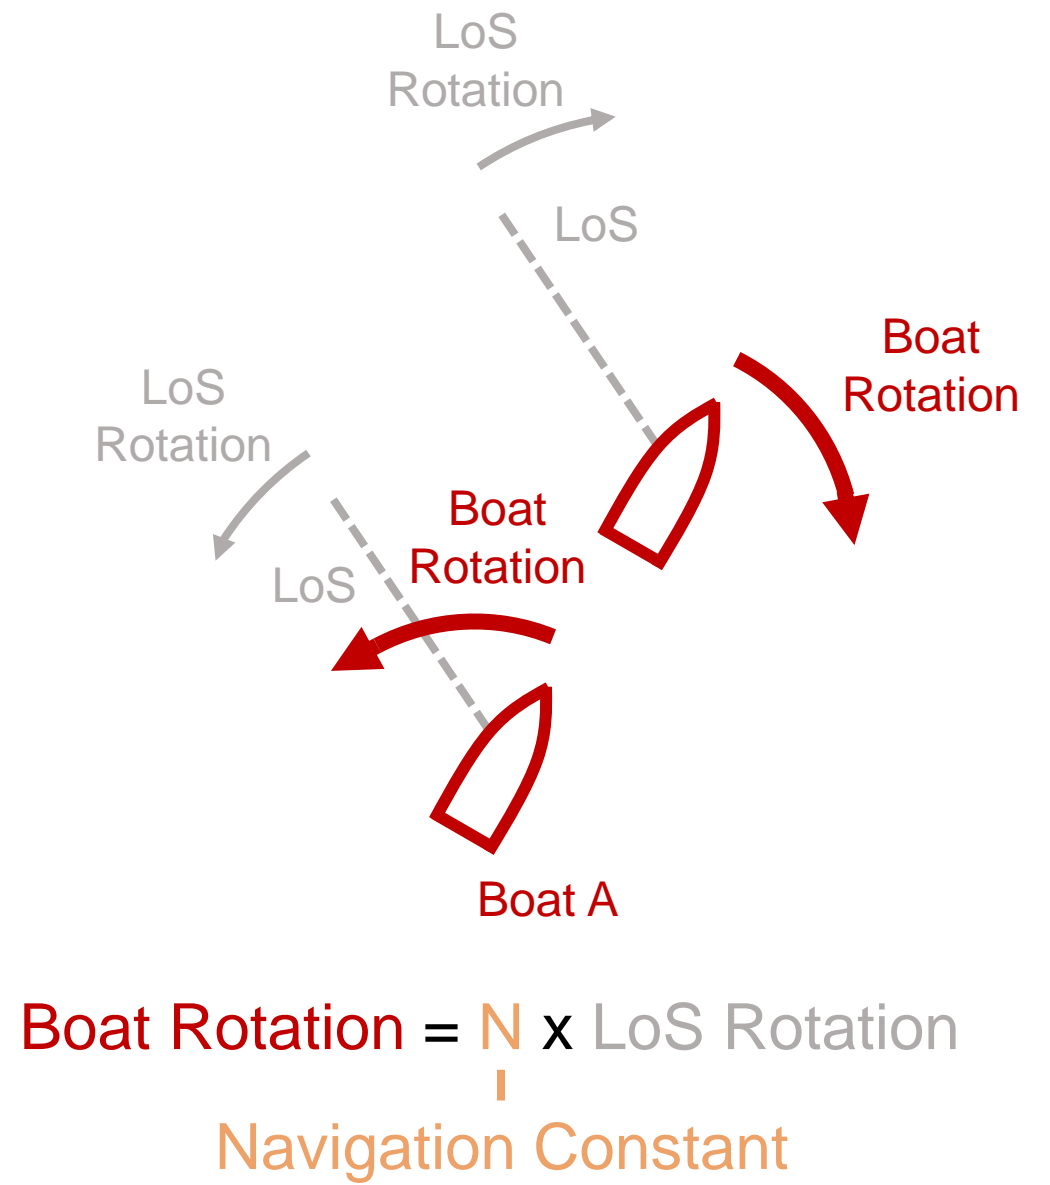

(c) Range Vector Correlation

| Step 1                                                                             | Step 2                                                                               | Step 3                                                                                | Step 4                                                                                |
|------------------------------------------------------------------------------------|--------------------------------------------------------------------------------------|---------------------------------------------------------------------------------------|---------------------------------------------------------------------------------------|
| 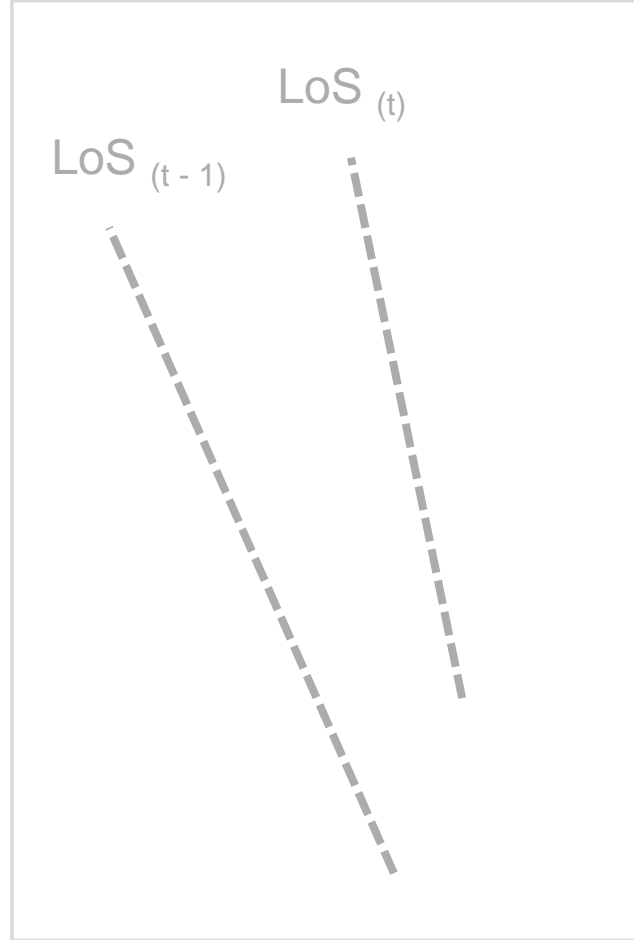 |  |  |  |
| <p>Obtain lines-of-sight between target and interceptor.</p>                       | <p>Obtain the time derivative difference vectors of LoS.</p>                         | <p>Measure the angle between difference vectors and LoS.</p>                          | <p>Convert the difference angle to correlation value.</p>                             |
